# Supplementary material for: Emerging Severe Acute Respiratory Syndrome Coronavirus 2 Mutation Hotspots Associated With Clinical Outcomes and Transmission
Source: Frontiers journal article supplement (doi:10.3389/fmicb.2021.753823), 2021-10-18

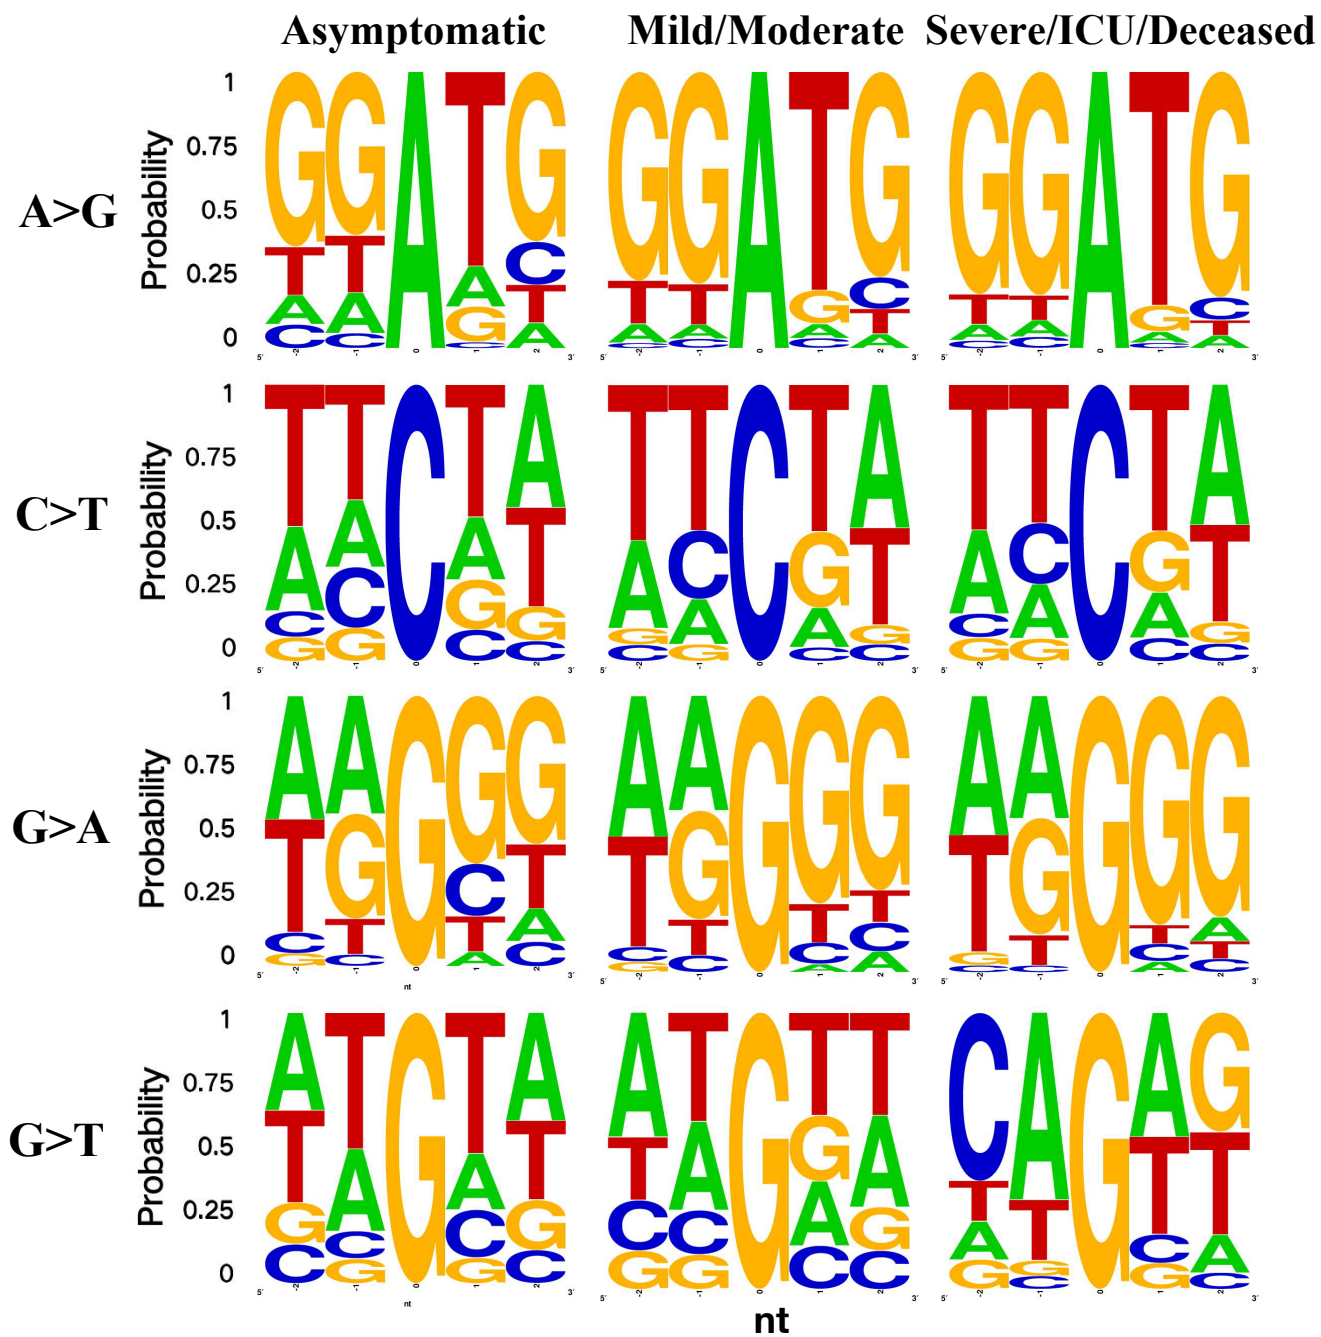

Supplement: Data_Sheet_2.PDF [file Data_Sheet_2.PDF]
